# Supplementary material for: 2D MXene-containing polymer electrolytes for all-solid-state lithium metal batteries
Source: Royal Society of Chemistry journal article supplement (doi:10.1039/c8na00206a), 2018-09-14
Supplement: c8na00206a1.pdf [file c8na00206a1.pdf]

## Supporting Information

### 2D MXene-Containing Polymer Electrolytes for All-Solid-State Lithium Metal Batteries

Qiwei Pan<sup>a,b,\*</sup>, Yongwei Zheng<sup>a</sup>, Sankalp Kota<sup>a</sup>, Weichun Huang<sup>a,c</sup>, Shijun Wang<sup>a</sup>, Hao Qi<sup>a</sup>,  
Seyong Kim<sup>a</sup>, Yingfeng Tu<sup>c</sup>, Michel W. Barsoum<sup>a</sup>, Christopher Y. Li<sup>a,\*</sup>

*a. Department of Material Science and Engineering, Drexel University, Philadelphia, PA  
19104, United States*

*b. College of Materials Science and Engineering, South China University of Technology,  
Guangzhou, China, 510640. Email: panqw@scut.edu.cna*

*c. College of Chemistry, Chemical Engineering and Materials Science, Soochow  
University, Suzhou 215123, China*

#### 1. Wide-angle X-ray diffraction (WAXD)

WAXD was performed on a Rigaku S-MAX 3000 SAXS system, with a microfocus sealed tube X-ray source providing monochromatic beam at wavelength of 1.54 Å. WAXD patterns were collected with an image plate.

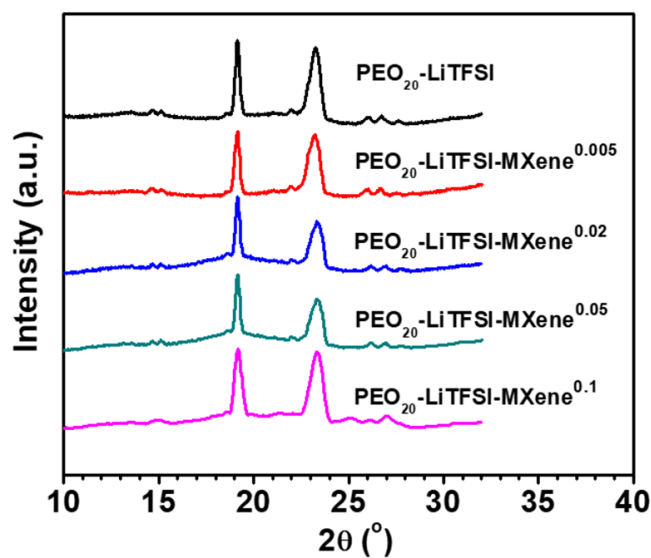

Fig. S1. WAXD patterns for  $\text{PEO}_{20}\text{-LiTFSI}$  and CPEs with different MXene content.

## 2. Electronic conductivity measurement

The electronic conductivity of the CPE was measured with a DC method. The CPE membrane was placed in-between two stainless steel electrodes. Polarization with a  $\Delta V = 1$  V was performed.

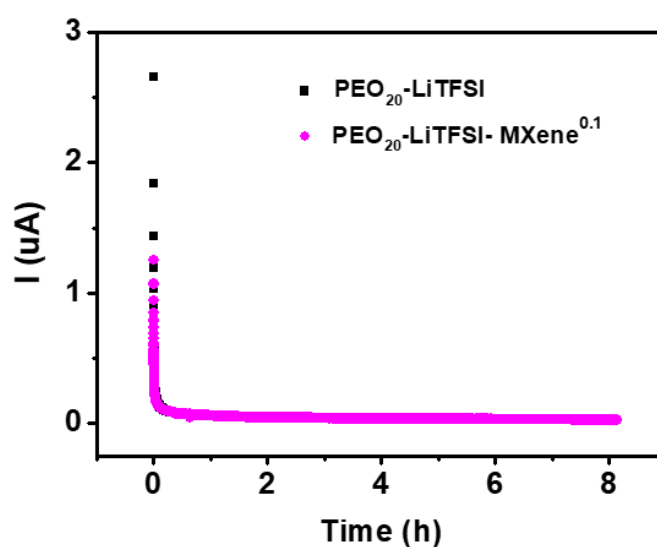

Fig. S2. DC polarization curves for  $\text{PEO}_{20}\text{-LiTFSI}$  and  $\text{PEO}_{20}\text{-LiTFSI-MXene}^{0.1}$  at  $60^{\circ}\text{C}$ .

### 3. Vogel-Tammann-Fulcher fitting of the temperature dependent ionic conductivity.

The temperature-dependent conductivity data were fitted using the modified Vogel-Tammann-Fulcher (VTF) equation (Equation 1):

$$\sigma = AT^{-1/2} e^{-E_a / R(T-T_0)}$$

where,  $T_0$  is the Vogel temperature which is  $\sim (T_g - 50)$ . The pre-factor A is related to the charge carrier concentration of dissociated ions and  $E_a$  is related to the activation energy of ion motion.

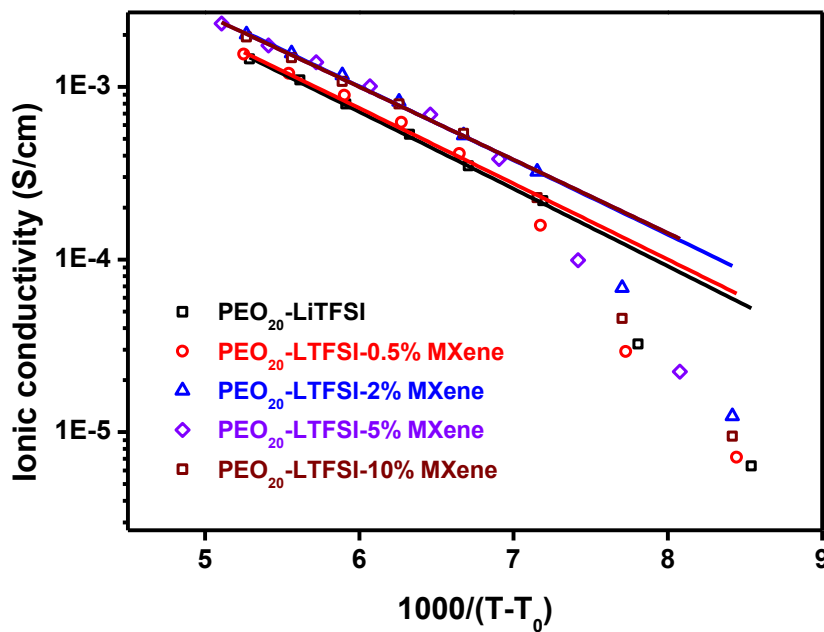

Fig. S3. VTF fitting of the temperature dependent ionic conductivity.

Table S1. VFT fitting parameters of the solid polymer electrolytes.

| <b>Samples</b>                                   | <b>A (S cm<sup>-1</sup> K<sup>1/2</sup>)</b> | <b>E<sub>a</sub> (kJ mol<sup>-1</sup>)</b> |
|--------------------------------------------------|----------------------------------------------|--------------------------------------------|
| PEO <sub>20</sub> -LiTFSI                        | 7.83 ± 2.19                                  | 8.83 ± 0.42                                |
| PEO <sub>20</sub> -LiTFSI-MXene <sup>0.005</sup> | 7.28 ± 2.91                                  | 8.66 ± 0.61                                |
| PEO <sub>20</sub> -LiTFSI-MXene <sup>0.02</sup>  | 8.57 ± 2.55                                  | 8.48 ± 0.45                                |
| PEO <sub>20</sub> -LiTFSI-MXene <sup>0.05</sup>  | 7.85 ± 2.69                                  | 8.38 ± 0.53                                |
| PEO <sub>20</sub> -LiTFSI-MXene <sup>0.1</sup>   | 7.88 ± 2.70                                  | 8.37 ± 0.53                                |

The fitting results show that at high temperature, the ion transport follows a VTF mechanism.

The diverge from VTF behavior at low temperature is due to PEO crystallization. It seems that with adding MXenes, the activation energy slight decreases, although we acknowledge that the change is relatively small.

#### **4. Galvanostatic cycling of the Li|MCPE|Li symmetric cell**

Galvanostatic cycling measurement was performed on a Li|MCPE|Li symmetric coin cell (2032 type) with an Arbin battery tester at 60 °C. The current density is 0.3 mA cm<sup>-2</sup>. The diameter of the lithium foil was 6 mm. The thickness of the composite polymer electrolytes PEO<sub>20</sub>-LiTFSI-MXene<sup>0.02</sup> was around 150 μm. Coin cell was assembled in an argon-filled MBraun glove box (H<sub>2</sub>O < 1 ppm, O<sub>2</sub> < 1 ppm). Repeated one-hour charge and one-hour discharge cycles were performed for the galvanostatic cycling measurements.

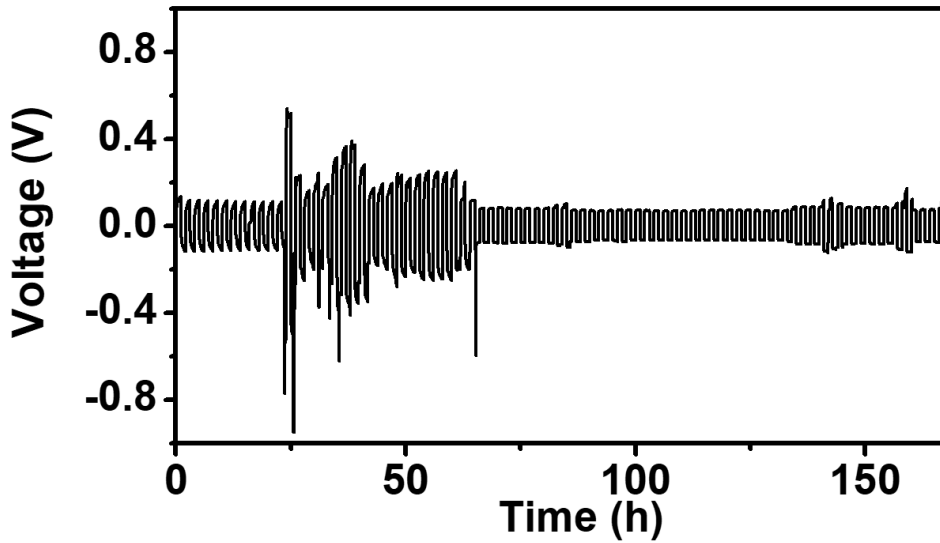

Fig. S4. Galvanostatic cycling curve of the Li symmetric cell with PEO<sub>20</sub>-LiTFSI-MXene<sup>0.02</sup> as separator at a current density of 0.3 mA cm<sup>-2</sup> at 60 °C.

**5. Electrochemical impedance spectroscopy (EIS) of the LiFePO<sub>4</sub>|PEO<sub>20</sub>-LiTFSI-MXene<sup>0.02</sup>|Li battery.**

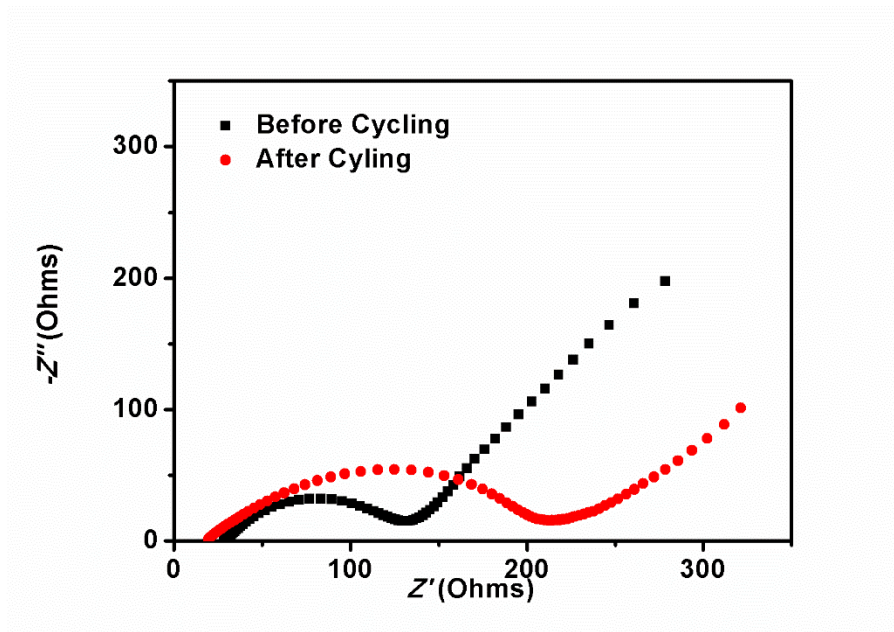

Fig. S5. Nyquist plots of the LiFePO<sub>4</sub>|PEO<sub>20</sub>-LiTFSI-MXene<sup>0.02</sup>|Li battery before and after 100 galvanostatic cycles at a C/3 rate and 60 °C
